# Supplementary material for: A wheel-shaped gallium-sulfide molecular ring with enhanced photocatalytic activity via indium alloying
Source: Royal Society of Chemistry journal article supplement (doi:10.1039/d3qi00432e), 2023-01-01
Supplement: d3qi00432e1.pdf [file d3qi00432e1.pdf]

*Supporting Information for*

**A Wheel-Shaped Gallium-Sulfide Molecular Ring with  
Enhanced Photocatalytic Activity via Indium Alloying**

Tao Wu,<sup>\*,a,b</sup> Bing Han,<sup>b</sup> Jia-Xin Liu,<sup>a</sup> Jiayu Zhang,<sup>b</sup> Chaozhuang Xue,<sup>b</sup> Xiang Wang,<sup>\*,c</sup>  
and Dong-Sheng Li<sup>d</sup>

<sup>a</sup> College of Chemistry and Materials Science, Guangdong Provincial Key Laboratory of Functional Supramolecular Coordination Materials and Applications, Jinan University, Guangzhou, Guangdong 510632, China.

<sup>b</sup> College of Chemistry, Chemical Engineering and Materials Science, Soochow University, Suzhou, Jiangsu 215123, China.

<sup>c</sup> School of New Energy Materials and Chemistry, Leshan Normal University, Leshan, Sichuan 614004, China.

<sup>d</sup> College of Materials and Chemical Engineering, Hubei Provincial Collaborative Innovation Center for New Energy Microgrid, Key Laboratory of Inorganic Nonmetallic Crystalline and Energy Conversion Materials, China Three Gorges University, Yichang, Hubei 443002, China

\* Corresponding author E-mails: [wutao@jnu.edu.cn](mailto:wutao@jnu.edu.cn); [516443537@qq.com](mailto:516443537@qq.com).

## Experimental Section

**Single-crystal X-ray diffraction (SCXRD).** Single-crystal X-ray diffraction measurements were performed on a Bruker Photon II CPAD area diffractometer using graphite mono-chromated Mo-K $\alpha$  ( $\lambda = 0.71073 \text{ \AA}$ ) radiation at 120 K controlled by nitrogen-flow. The structure was solved by direct method using SHELXS-2014 and the refinement against all reflections of the compounds was performed using SHELXL-2014. The highly disordered solvent molecules were subtracted from the reflection data by using the SQUEEZE method in PLATON program. A summary of the structure refinement parameters is presented in Table S1.

**Powder X-ray Diffraction (PXRD).** PXRD data were recorded on a desktop diffractometer (D2 PHASER, Bruker, Germany) using Cu-K $\alpha$  ( $\lambda = 1.54184 \text{ \AA}$ ) radiation operated at 30 kV and 10 mA.

**Elemental Analysis.** Energy dispersive spectroscopy (EDS) analysis was performed on scanning electron microscope (SEM) equipped with energy dispersive spectroscopy detector. An accelerating voltage of 25 kV and 40 s accumulation time were applied. Elemental analysis (EA) of C, H, and N was performed on Vario EL III elemental analyzer. The elemental ratio of In/Ga was determined by using both an inductively coupled plasma atomic emission spectrometer 710-ES (ICP-AES, Varian Instruments): In/Ga=0.491.

**Thermogravimetric Analysis (TGA).** TGA measurement was performed with a Shimadzu TGA-50 system under nitrogen flow. The TG curve was performed by heating the sample from room temperature to 800 °C with heating rate of 10 °C /min.

**Fourier Transform Infrared Absorption.** Fourier transform-Infrared spectral analysis was performed on a Thermo Nicolet Avatar 6700 FT-IR spectrometer with cesium iodide optics allowing the instrument to observe from 600-4000  $\text{cm}^{-1}$ .

**UV-Vis Absorption.** Room-temperature solid-state UV-Vis diffusion reflectance spectra of crystal samples were measured on a SHIMADZU UV-3600 UV-Vis-NIR spectrophotometer coupled with an integrating sphere by using BaSO<sub>4</sub> powder as the reflectance reference. The absorption spectra were calculated from reflectance spectra by using the Kubelka-Munk function:  $F(R)=\alpha/S=(1-R)^2/2R$ , where  $R$ ,  $\alpha$ , and  $S$  are the reflection, the absorption and the scattering coefficient, respectively. To determine the band edge of the direct-gap semiconductor, the relation between the absorption coefficients ( $\alpha$ ) and the incident photon energy ( $h\nu$ ) is exhibited as  $ah\nu= A\times(h\nu- E_g)^{1/2}$ , where  $A$  is a constant that relates to the effective masses associated with the valence and conduction bands, and  $E_g$  is the optical transition gap of the solid material. The band gap of the obtained samples can be determined from the Tauc plot with  $[F(R) \times h\nu]^2$  vs.  $h\nu$  by extrapolating the linear region to the abscissa.

**Photoelectric Response.** The photocurrent experiments were performed on a CHI760E electrochemistry workstation in standard three-electrode configuration, with the sample coated ITO glass (6×1 cm, effective area is around 1 cm<sup>2</sup>) as the working electrode, a Pt wire as the auxiliary electrode, and a saturated calomel electrode (SCE) as the reference electrode. The light source is a 150 W high-pressure xenon lamp, located 19 cm away from the surface of the ITO electrode and the illumination intensity on the surface of the photoelectrode was ~100 mW/cm<sup>2</sup>. Sodium sulfate aqueous solution (0.5 M, 100 mL) was used as the supporting electrolyte. Typical preparation of the working electrode is as follows: 5.0 mg of ground sample powder was dispersed in 10 mL isopropanol with the presence of 1.0 mg of Mg(NO<sub>3</sub>)<sub>2</sub>·6H<sub>2</sub>O (addition Mg(NO<sub>3</sub>)<sub>2</sub>·6H<sub>2</sub>O for increasing conductivity). The sealed mixture suspension was continuously stirred for one day, and then ultrasonicated for half hour before electrophoretic deposition. The clean and sleek Pt plate electrode was used as anode, and the clean indium-tin-oxide (ITO) conductive glass as cathode. The whole electro-deposition process lasted for 30 minutes under a constant working voltage of 30 V. The obtained ITO electrode decorated with **WSC-1** or

**WSC-1-In** film on its surface was finally washed with ethanol to remove residual isopropanol and  $\text{Mg}(\text{NO}_3)_2$  salt.

**Electrochemical Mott-Schottky Experiments.** Mott-Schottky plots were measured by conducting impedance-frequency measurement. The capacitance of the semiconductor-electrolyte interface was collected at different frequency of 1000, 1500 and 2000 Hz. Before testing, 2 mg finely ground sample was placed in a sample tube and then 420  $\mu\text{L}$  ethanol, 30  $\mu\text{L}$  water and 50  $\mu\text{L}$  D-521 Nafion solution (5 wt% in propanol) were mixed and then ultrasonicated for 1 h. The mixed sample (40  $\mu\text{L}$ ) was deposited on a  $6 \times 1 \text{ cm}^2$  ITO conductive glass with a sample deposition area of  $1 \times 1 \text{ cm}^2$  and then dried at room temperature. Finally, electrochemical experiments were carried out in a same three-electrode system as for photocurrent measurement with sample coated ITO glass as the working electrode, a Pt wire as the auxiliary electrode, a Ag/AgCl electrode as the reference electrode and 0.5 M sodium sulfate solution as the electrolyte.

**Photocatalytic Hydrogen Generation:** The  $\text{H}_2$  production experiment were carried out in a closed vacuum glass gas-circulation system with a top window (Perfect-Light, Labsolar-6A). Firstly, 25 mg samples were finely ground and mixed with 90 mL deionized  $\text{H}_2\text{O}$  and 10 mL triethanolamine as the sacrificial reagent. The mixture was then poured into a 250 mL quartz vessel, where 1 mg (equal to 2 wt.% Pt)  $\text{Pt}(\text{NH}_3)_4(\text{NO}_3)_2$  was added. Next, this system was evacuated to *ca.* 1.0 kPa at low temperature (5 °C) and then irradiated by a 300 W Xe lamp. During the photocatalytic reaction, the reaction solution was under a continuous magnetic stirring at 5 °C by a flow of cooling water. Finally, the evolved  $\text{H}_2$  was analyzed by gas chromatography equipped with a thermal conductive detector (GC9790II, Fuli) and  $\text{N}_2$  as carrier gas.

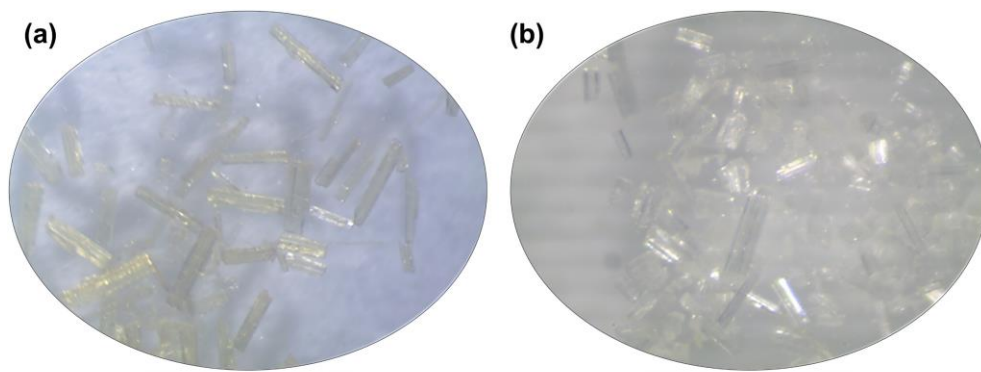

**Figure S1.** Photographs of the crystals of (a) **WSC-1** and (b) **WSC-1-In**.

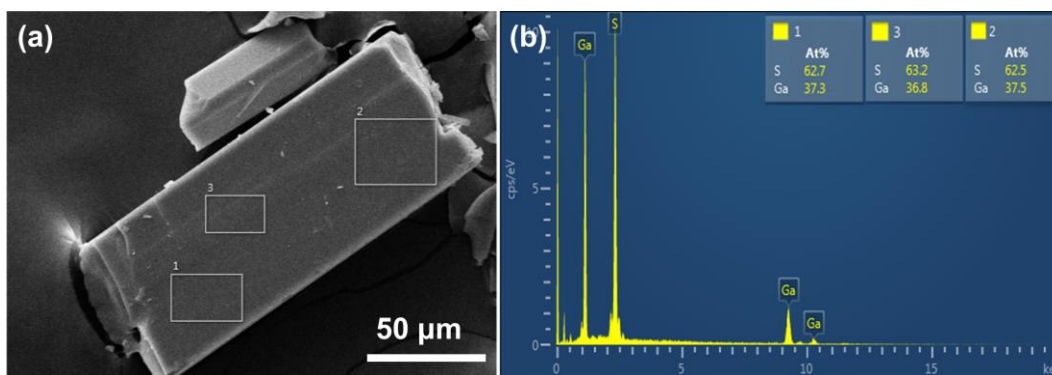

**Figure S2.** (a) SEM images of as-synthesized **WSC-1** crystal and (b) corresponding energy dispersive spectroscopy (EDS) of **WSC-1**.

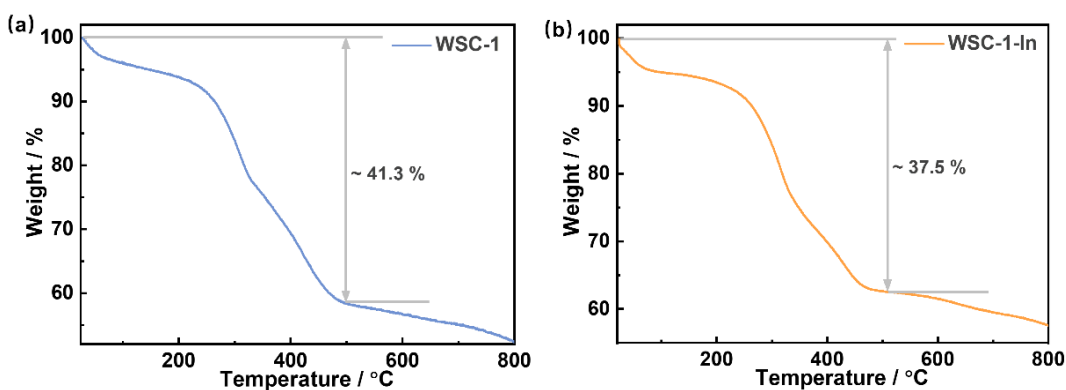

**Figure S3.** TGA curves of (a) **WSC-1** and (b) **WSC-1-In**.

The thermogravimetric (TG) analysis of **WSC-1** (Figure S3a) showed multiple decomposition steps from room temperature to *ca.* 500 °C under N<sub>2</sub> conditions,

indicating the loss of non-coordinated and coordinated cyclopentylamine molecules in **WSC-1**. And the total loss ( $\sim 41.3\%$ ) is consistent with weight ratio of cyclopentylamine molecules (41.0 %) in the empirical formula of **WSC-1** ( $[\text{Ga}_{24}\text{S}_{40}(\text{C}_5\text{H}_{11}\text{N})_{16}(\text{C}_5\text{H}_{12}\text{N})_8]$ ). As for **WSC-1-In** (Figure S3b), similar process also occurred during the TG measurement and the total loss ( $\sim 37.5\%$ ) is consistent with weight ratio of cyclopentylamine molecules (38.2 %) in the empirical formula of **WSC-1-In** ( $[\text{Ga}_{16}\text{In}_8\text{S}_{40}(\text{C}_5\text{H}_{11}\text{N})_{16}(\text{C}_5\text{H}_{12}\text{N})_8]$ ).

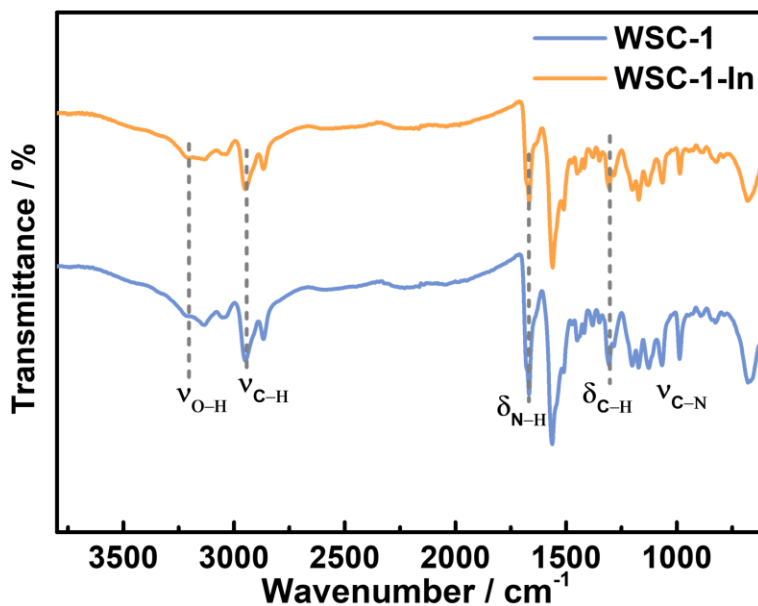

**Figure S4.** FTIR spectrum of (a) **WSC-1** (b) **WSC-1-In**.

The broad vibrational bands of IR at about  $3440$  and  $3250\text{ cm}^{-1}$  indicate the presence of the  $-\text{NH}_2$  group and  $\text{H}_2\text{O}$  molecules. Those at about  $2920$  and  $2840\text{ cm}^{-1}$  are assigned to the C–H vibrational bands of CPA molecules.

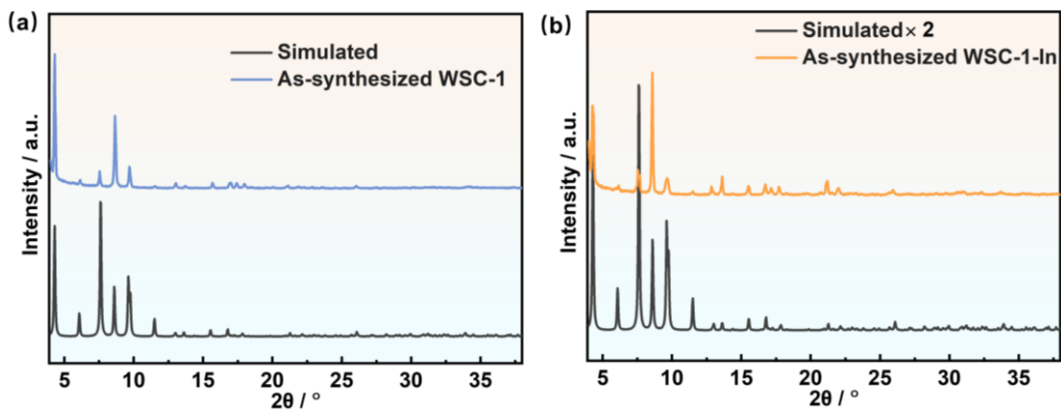

**Figure S5.** The simulated and experimental PXRD patterns of as-synthesized **WSC-1** and **WSC-1-In**.

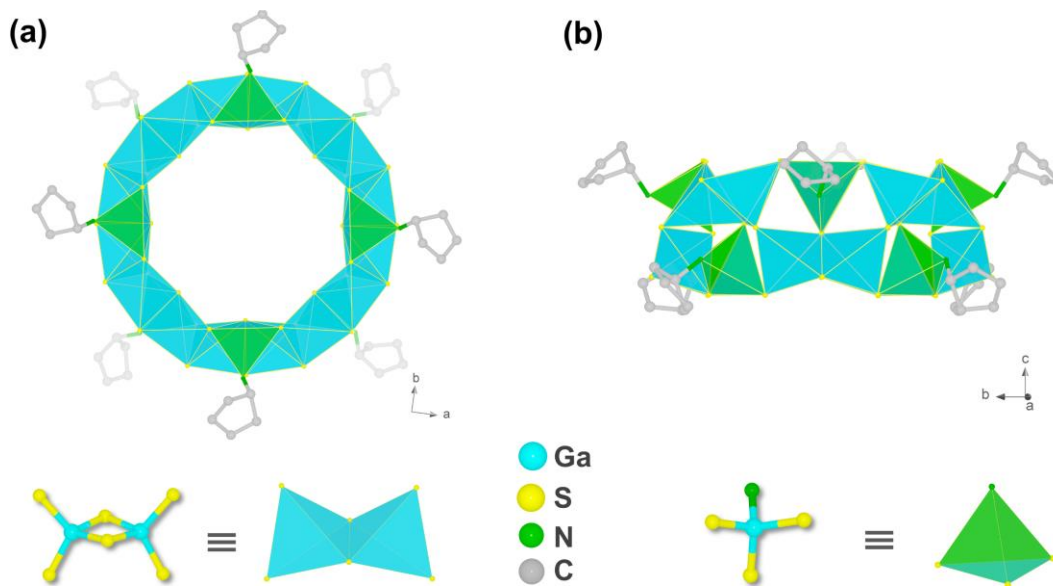

**Figure S6.** (a) Top down and (b) side view of the polyhedral model of wheel-shaped **WSC-1** molecular ring. Hydrogen atoms are omitted for clarity.

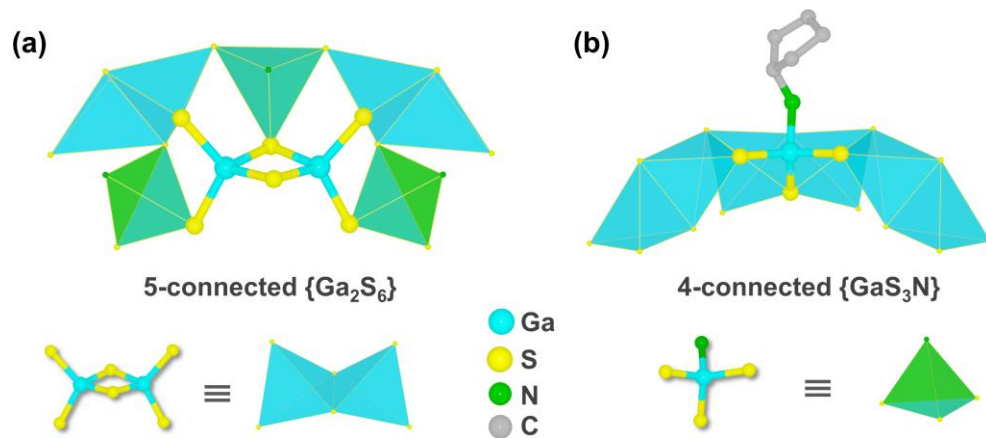

**Figure S7.** View of the polyhedral/ball-and-stick models of (a) 5-connected  $\{\text{Ga}_2\text{S}_6\}$  and (b) 4-connected  $\{\text{GaS}_3\text{N}\}$  unit. Hydrogen atoms are omitted for clarity.

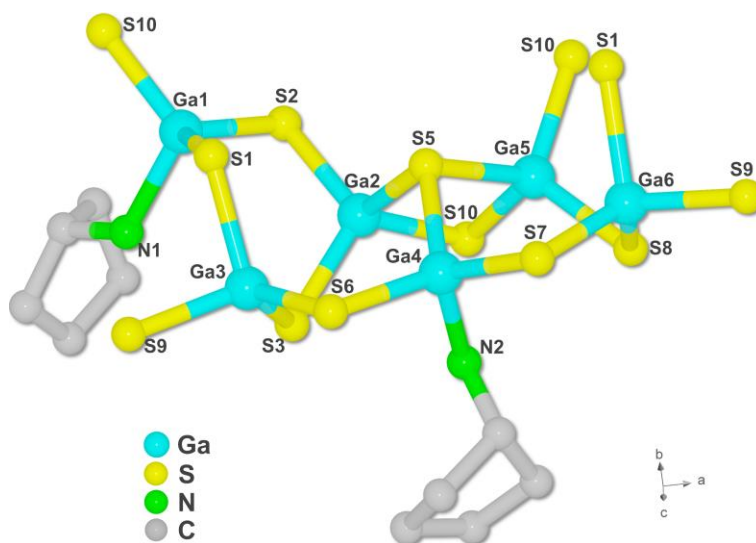

**Figure S8.** The asymmetric unit of **WSC-1** with the selected labeling scheme. Hydrogen atoms are omitted for clarity.



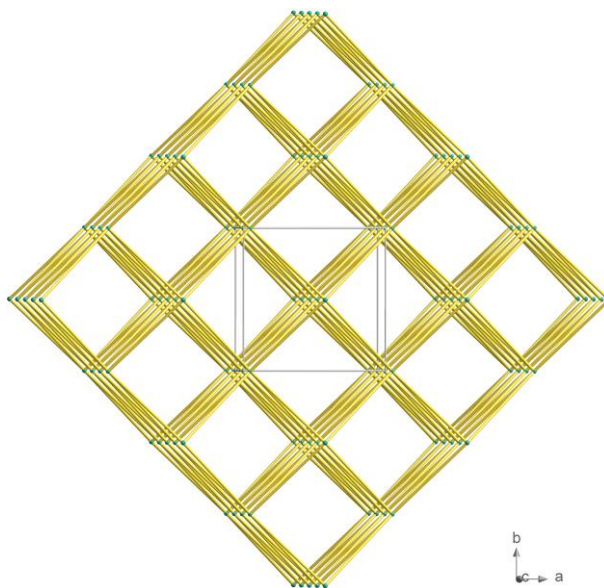

**Figure S9.** Illustration of the squashed *BCU*-type arrangement mode of ring clusters in **WSC-1** *via* connecting the centers of adjacent cluster (viewed along *c* axis).

By treating each barycenter of ring cluster as a pseudo atom (X) and connecting adjacent X atom (the X-X distance is ca. 21.4 Å), the arrangement mode of the **WSC-1** clusters is found to be squashed *BCU* (body centered cubic)-type superlattice.

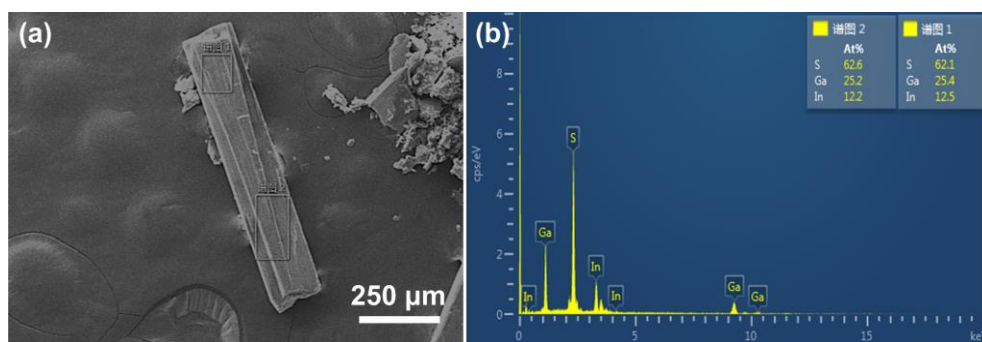

**Figure S10.** (a) SEM images of as-synthesized **WSC-1-In** crystal and (b) corresponding energy dispersive spectroscopy (EDS) of **WSC-1-In**.

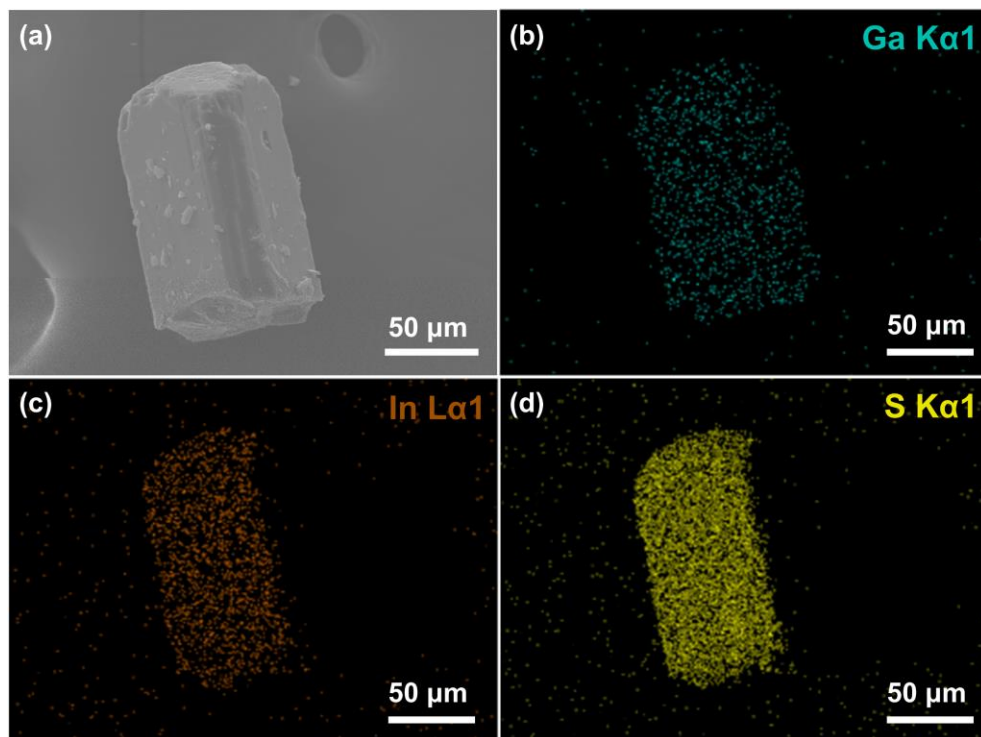

**Figure S11.** (a) SEM images and (b-d) corresponding elemental distribution maps of as-synthesized **WSC-1-In** crystal.

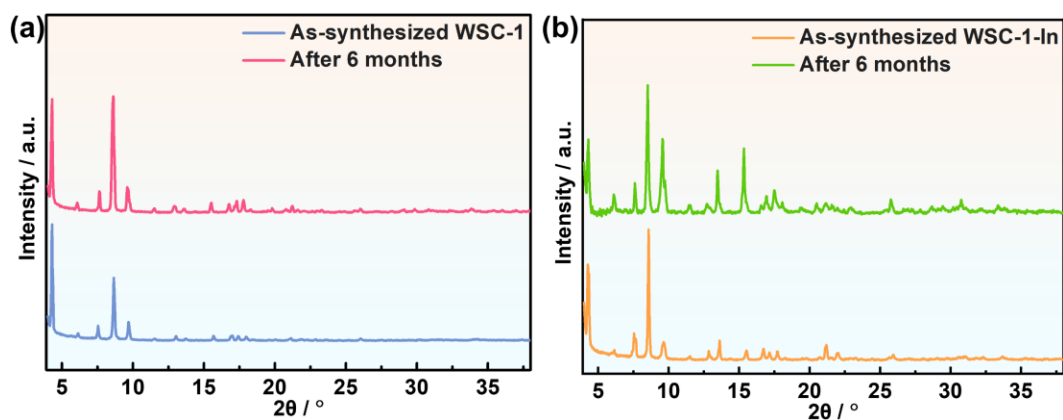

**Figure S12.** PXRD patterns of as-synthesized (a) **WSC-1** and (b) **WSC-1-In** exposed in air after six months.

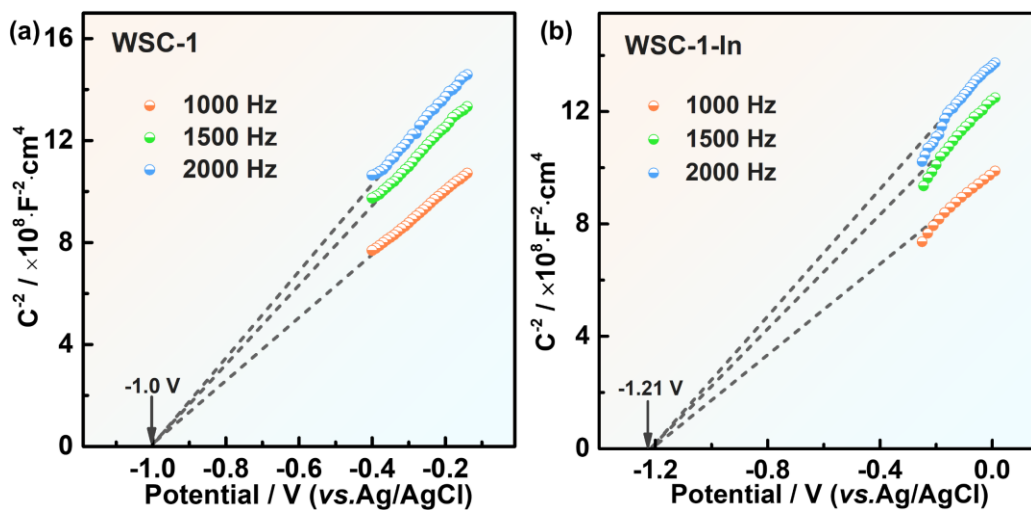

**Figure S13.** Mott-Schottky plots of (a) **WSC-1** and (b) **WSC-1-In** measured at different frequency.

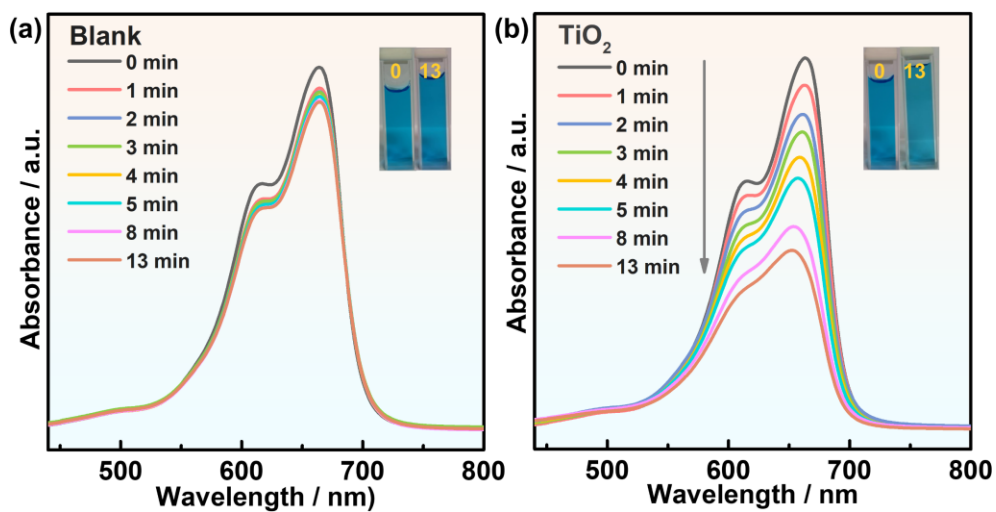

**Figure S14.** UV-Vis absorption spectra of MB versus time with (a) blank control and (b) TiO<sub>2</sub> as catalyst under full spectrum solar light irradiation. (Inset, photographs of MB solution before and after photodegradation).

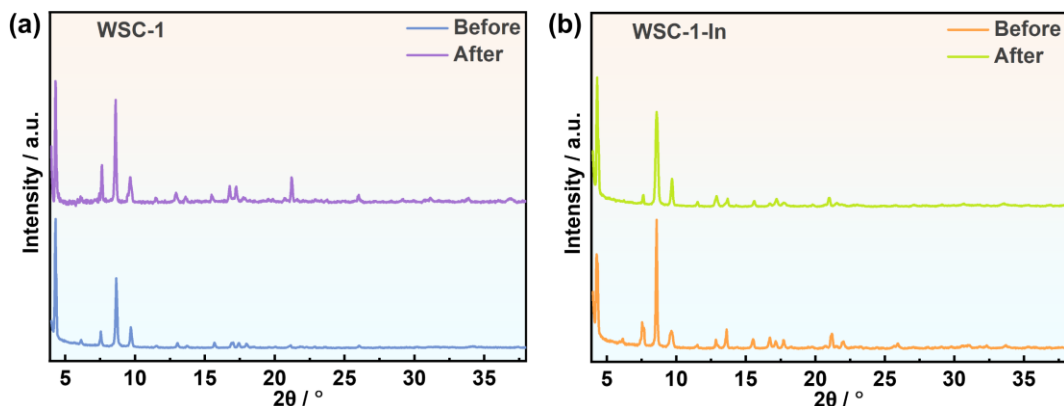

**Figure S15.** PXRD patterns of as-synthesized (a) **WSC-1** and (b) **WSC-1-In** before and after photocatalytic experiment.

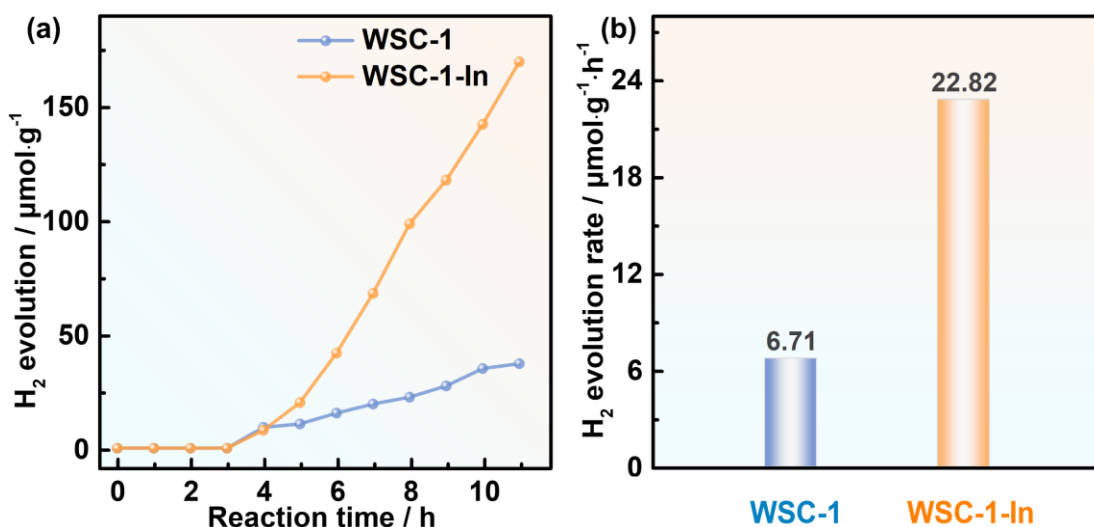

**Figure S16.** Comparison of the photocatalytic H<sub>2</sub> production of **WSC-1** and **WSC-1-In** under full spectrum solar light irradiation.

As the CBs of both title compounds are more negative than  $E_{\text{H}^+/\text{H}_2}$  (-0.41 V, pH=7), photocatalytic H<sub>2</sub> evolution was further investigated to assess the solar energy utilization of the title compounds.<sup>1, 2</sup> As shown in Figure S16a, the initial low H<sub>2</sub> generation rate could be attributed to the competition for electrons between Pt<sup>4+</sup> species reduction and H<sup>+</sup> reduction in the initial 3h according to the literature.<sup>1, 2</sup> With continuous reduction of

$[\text{Pt}(\text{NH}_3)_4]^{2+}$  to Pt and the completion of reduction, more photoelectrons were used for  $\text{H}^+$  reduction to  $\text{H}_2$ , resulting in a following gradual increased and finally stable  $\text{H}_2$  evolution rate.<sup>1,2</sup> And the possible mechanism for the photocatalytic  $\text{H}_2$  evolution is proposed as follows.<sup>1,2</sup> Upon solar light absorption, photo-generated electrons are excited from VB to CB and then transferred and trapped by Pt which generated from photoreduction of  $[\text{Pt}(\text{NH}_3)_4]^{2+}$ . The as-formed Pt acted as a co-catalyst for accepting photoelectron to reduce surface-adsorbed  $\text{H}^+$  to  $\text{H}_2$ . Meanwhile, the TEOA molecules acting as a hole scavenger are oxidized to carbonaceous materials by the photogenerated holes in the VB. As the CB of **WSC-1-In** is more negative than that of **WSC-1** (Figure S19), a stronger driving force for  $\text{H}^+$  reduction is afforded by WSC-1-In, resulting larger  $\text{H}_2$  generation rate for **WSC-1-In**.<sup>1,2</sup>

**Table S1.** Crystallographic data and structure refinement parameters of **WSC-1** (As the diffraction capability of cluster-based chalcogenide is usually weak, especially for the structures that are constructed by isolated clusters,<sup>3</sup> the crystal data for **WSC-1-In** is not available due to its poor diffraction data).

| <b>Compound</b>                                                                     | <b>WSC-1</b>                                                                    |
|-------------------------------------------------------------------------------------|---------------------------------------------------------------------------------|
| Empirical formula                                                                   | C <sub>40</sub> H <sub>88</sub> Ga <sub>24</sub> N <sub>8</sub> S <sub>40</sub> |
| Formula weight                                                                      | 3637.13                                                                         |
| Crystal morphology                                                                  | prism                                                                           |
| Crystal system                                                                      | Tetragonal                                                                      |
| Space group                                                                         | <i>I4</i>                                                                       |
| <i>Z</i>                                                                            | 2                                                                               |
| <i>T</i> /K                                                                         | 119.99                                                                          |
| $\lambda/\text{\AA}$                                                                | 0.71073                                                                         |
| <i>a</i> /\AA                                                                       | 28.870(2)                                                                       |
| <i>b</i> /\AA                                                                       | 28.870(2)                                                                       |
| <i>c</i> /\AA                                                                       | 12.6517(9)                                                                      |
| $\alpha/^\circ$                                                                     | 90                                                                              |
| $\beta/^\circ$                                                                      | 90                                                                              |
| $\gamma/^\circ$                                                                     | 90                                                                              |
| <i>V</i> /\AA <sup>3</sup>                                                          | 10545.0(16)                                                                     |
| <i>D</i> (g/cm <sup>3</sup> )                                                       | 1.140                                                                           |
| $\mu/\text{mm}^{-1}$                                                                | 3.420                                                                           |
| <i>F</i> (000)                                                                      | 3500.0                                                                          |
| Collected reflections                                                               | 44737                                                                           |
| Independent reflections                                                             | 9636                                                                            |
| GOF on <i>F</i> <sup>2</sup>                                                        | 0.987                                                                           |
| <i>R</i> <sub>1</sub> , <i>wR</i> <sub>2</sub> ( <i>I</i> >2 $\sigma$ ( <i>I</i> )) | 0.0467, 0.1301                                                                  |
| <i>R</i> <sub>1</sub> , <i>wR</i> <sub>2</sub> (all data)                           | 0.0934, 0.1623                                                                  |

**Table S2.** Selected important bond lengths for **WSC-1**.

| <b>Bond</b>         | <b>Length/Å</b> |
|---------------------|-----------------|
| Ga1-S2              | 2.236(4)        |
| Ga1-S1              | 2.270(4)        |
| Ga1-S10             | 2.206(5)        |
| Ga1-N1              | 2.053(12)       |
| Ga2-S3              | 2.277(4)        |
| Ga2-S4              | 2.268(5)        |
| Ga2-S2              | 2.254(4)        |
| Ga2-S5              | 2.350(4)        |
| Ga3-S3              | 2.278(4)        |
| Ga3-S6              | 2.220(4)        |
| Ga3-S9              | 2.229(4)        |
| Ga3-S1              | 2.358(4)        |
| Ga4-S6              | 2.238(4)        |
| Ga4-S7              | 2.203(4)        |
| Ga4-S5              | 2.324(4)        |
| Ga4-N2 <sup>a</sup> | 1.98(4)         |
| Ga5-S4              | 2.255(5)        |
| Ga5-S8              | 2.268(5)        |
| Ga5-S5              | 2.371(5)        |
| Ga5-S10             | 2.258(5)        |
| Ga6-S9              | 2.257(4)        |
| Ga6-S8              | 2.267(5)        |
| Ga6-S7              | 2.219(4)        |
| Ga6-S1              | 2.378(5)        |

<sup>a</sup>  $d_{\text{Ga4-N2}} = (d_{\text{Ga4-N2}} + d_{\text{Ga4-N2A}})/2,$

**Table S3.** Selected important bond angles for **WSC-1**.

| Bond                   | Angle/°    | Bond        | Angle/°    |
|------------------------|------------|-------------|------------|
| S2-Ga1-S1              | 114.48(17) | S4-Ga5-S5   | 95.45(16)  |
| S10-Ga1-S2             | 110.74(18) | S4-Ga5-S10  | 112.04(17) |
| S10-Ga1-S1             | 113.42(17) | S8-Ga5-S5   | 112.25(14) |
| N1-Ga1-S2              | 104.5(3)   | S10-Ga5-S8  | 113.24(18) |
| N1-Ga1-S1              | 102.3(3)   | S10-Ga5-S5  | 109.3(2)   |
| N1-Ga1-S10             | 110.7(4)   | S9-Ga6-S8   | 111.34(19) |
| S3-Ga2-S5              | 111.12(14) | S9-Ga6-S1   | 94.72(15)  |
| S4-Ga2-S3              | 113.6(2)   | S8-Ga6-S1   | 111.39(15) |
| S4-Ga2-S5              | 95.67(17)  | S7-Ga6-S9   | 115.27(16) |
| S2-Ga2-S3              | 112.52(16) | S7-Ga6-S8   | 114.23(18) |
| S2-Ga2-S4              | 112.01(17) | S7-Ga6-S1   | 108.2(2)   |
| S2-Ga2-S5              | 110.80(19) | Ga1-S2-Ga2  | 99.24(13)  |
| S3-Ga3-S1              | 110.94(14) | Ga1-S1-Ga3  | 103.49(17) |
| S6-Ga3-S3              | 113.03(17) | Ga1-S1-Ga6  | 103.5(2)   |
| S6-Ga3-S9              | 112.91(15) | Ga1-S10-Ga5 | 100.37(15) |
| S6-Ga3-S1              | 110.02(19) | Ga2-S3-Ga3  | 99.39(18)  |
| S9-Ga3-S3              | 112.67(18) | Ga2-S5-Ga5  | 81.77(14)  |
| S9-Ga3-S1              | 96.04(16)  | Ga3-S6-Ga4  | 100.01(13) |
| S6-Ga4-S5              | 113.90(17) | Ga3-S1-Ga6  | 80.79(13)  |
| S7-Ga4-S6              | 112.95(16) | Ga3-S9-Ga6  | 86.34(15)  |
| S7-Ga4-S5              | 112.05(18) | Ga4-S7-Ga6  | 101.65(15) |
| N2-Ga4-S6 <sup>a</sup> | 105.55(15) | Ga4-S5-Ga2  | 103.6(2)   |
| N2-Ga4-S7 <sup>a</sup> | 108.95(12) | Ga4-S5-Ga5  | 102.8(2)   |
| N2-Ga4-S5 <sup>a</sup> | 102.55(10) | Ga5-S4-Ga2  | 86.18(18)  |
| S4-Ga5-S8              | 113.3(2)   | Ga6-S8-Ga5  | 98.7(2)    |

<sup>a</sup>  $\theta_{N2-Ga4-Sx} = (\theta_{N2-Ga4-Sx} + \theta_{N2A-Ga4-Sx})/2$ .



**Table S4.** Comparison of the main-group metal chalcogenides ring clusters and sulfides-based inorganic nanoring clusters.

| Formula of anion cluster <sup>a</sup>                                                   | Metal             |        | Chalcogenide | Cluster shape              | Cluster size (Å) <sup>c</sup>                          | Ref.                                                            |
|-----------------------------------------------------------------------------------------|-------------------|--------|--------------|----------------------------|--------------------------------------------------------|-----------------------------------------------------------------|
|                                                                                         | Type <sup>b</sup> | Number |              |                            |                                                        |                                                                 |
| [Ga <sub>24</sub> S <sub>40</sub> (CPA) <sub>8</sub> ] <sup>8-</sup>                    | Ga                | 24     | S            | Wheel ring                 | ID: 9.92<br>OD: 15.72                                  | This work                                                       |
| [Ge <sub>16</sub> Se <sub>36</sub> ] <sup>8-</sup>                                      | Ge                | 16     | Se           | Square ring                | Inner size:<br>3.59×3.59<br>Outer size:<br>7.52×14.59  | <i>JACS Au</i> , <b>2022</b> ,<br>2, 204                        |
| [In <sub>18</sub> Te <sub>30</sub> (dach) <sub>6</sub> ] <sup>6-</sup>                  | In                | 18     | Te           | Wheel ring                 | ID: 8.25<br>OD: 15.54                                  | <i>Inorg. Chem.</i> ,<br><b>2012</b> , <i>51</i> , 1219         |
| [Mn <sub>9</sub> In <sub>33</sub> Se <sub>60</sub> (dach) <sub>24</sub> ] <sup>3-</sup> | In                | 33     | Se           | Triangular ring            | ID: 12.71<br>OD: 25.46                                 | <i>Chem. Commun</i><br><b>2015</b> , <i>51</i> , 10668          |
| [Sb <sub>3</sub> S <sub>6</sub> ] <sup>3-</sup>                                         | Sb                | 3      | S            | Twisted<br>triangular ring | ID: 2.96<br>OD: 3.98                                   | <i>Cryst. Growth<br/>Des.</i> <b>2011</b> , <i>11</i> ,<br>5554 |
| [Sb <sub>6</sub> S <sub>12</sub> ] <sup>6-</sup>                                        | Sb                | 6      | S            | Twisted<br>starlike ring   | ID: 5.08<br>OD: 10.56                                  |                                                                 |
| [Na <sub>2</sub> Fe <sub>18</sub> S <sub>30</sub> ] <sup>8-</sup>                       | Fe                | 18     | S            | Ellipse ring               | Inner size:<br>4.09×8.92<br>Outer size:<br>13.32×15.97 | <i>J. Am. Chem. Soc.</i><br><b>1988</b> , <i>110</i> , 6591     |
| [β-Na <sub>2</sub> Fe <sub>18</sub> S <sub>30</sub> ] <sup>8-</sup>                     | Fe                | 18     | S            | Ellipse ring               | Inner size:<br>4.08×7.18<br>Outer size:<br>12.39×16.29 | <i>J. Am. Chem. Soc.</i><br><b>1992</b> , <i>114</i> , 2697     |

<sup>a</sup> The formula of cations and solvent molecules are omitted for simplicity. The abbreviations of organic molecules including the formulas are listed as follows: CPA — cyclopentylamine; dach — 1,2-diaminocyclohexane.

<sup>b</sup> The metallic element referred to metals participated in the linkage of ring cluster.

<sup>c</sup> For circular-like ring cluster, ID is the abbreviation of Inner diameter and OD means outer diameter. While for ellipse ring, the inner and outer size of cluster mean the length of short axis × length of long axis.

**Table S5.** Comparison of the solvent-accessible void space between several recent reported typical discrete cluster-based crystalline metal chalcogenides.

| Formula of anion cluster <sup>a</sup>                                                                                                                              | Cluster type <sup>b</sup>        | Intercluster packing pattern <sup>c</sup>               | Solvent-accessible void space (%) <sup>d</sup> | Dispersion solvent                                          | Ref.                                                                                                                  |
|--------------------------------------------------------------------------------------------------------------------------------------------------------------------|----------------------------------|---------------------------------------------------------|------------------------------------------------|-------------------------------------------------------------|-----------------------------------------------------------------------------------------------------------------------|
| [Ga <sub>24</sub> S <sub>40</sub> (CPA) <sub>8</sub> ] <sup>8-</sup>                                                                                               | Wheel-shaped ring                | Elongated <i>BCU</i>                                    | 56.0                                           | Formamide                                                   | <b>This work</b>                                                                                                      |
| [In <sub>18</sub> Te <sub>30</sub> (dach) <sub>6</sub> ] <sup>6-</sup>                                                                                             | Wheel-shaped ring                | Squashed <i>BCU</i>                                     | 40.8                                           | NA <sup>e</sup>                                             | <i>Inorg. Chem.</i> , <b>2012</b> , <i>51</i> , 1219                                                                  |
| [Mn <sub>9</sub> In <sub>33</sub> Se <sub>60</sub> (dach) <sub>24</sub> ] <sup>3-2</sup><br>[In <sub>18</sub> Se <sub>30</sub> (dach) <sub>6</sub> ] <sup>6-</sup> | Triangular and wheel-shaped ring | 3-fold interpenetrating twisted <i>PCU</i> <sup>f</sup> | 49.5                                           | Dach                                                        | <i>Chem. Commun.</i> , <b>2015</b> , <i>51</i> , 10668                                                                |
| [Ge <sub>4</sub> S <sub>10</sub> ] <sup>4-</sup>                                                                                                                   | T2                               | Elongated <i>BCU</i>                                    | 65.9                                           | Water                                                       | <i>Inorg. Chem.</i> , <b>2017</b> , <i>56</i> , 3119                                                                  |
| [In <sub>10</sub> S <sub>16</sub> (DBN) <sub>4</sub> ] <sup>4-</sup><br>(ISC-3)                                                                                    | T3                               | Twisted Cubic <i>Dia</i>                                | 40.1                                           | DMF                                                         | <i>J. Am. Chem. Soc.</i> <b>2012</b> , <i>134</i> , 3619                                                              |
| [Sn <sub>10</sub> O <sub>8</sub> S <sub>16</sub> ] <sup>4-</sup>                                                                                                   | T3                               | <i>MTN</i>                                              | 77.2                                           | Water                                                       | <i>Chem. Commun.</i> , <b>2020</b> , 56,8388.                                                                         |
| [Zn <sub>4</sub> Ga <sub>14</sub> Sn <sub>2</sub> S <sub>35</sub> ] <sup>12-</sup><br>(OCF-40-ZnGaSnS)                                                             | T4                               | <i>BCU</i>                                              | 59.4                                           | DMF/DMSO/Piperidine                                         | <i>J. Am. Chem. Soc.</i> <b>2010</b> , <i>132</i> , 10823                                                             |
| [Cd <sub>4</sub> In <sub>16</sub> S <sub>31</sub> (DBN) <sub>4</sub> ] <sup>6-</sup><br>(ISC-5)                                                                    | T4                               | Cubic <i>Dia</i>                                        | 59                                             | DMSO                                                        | <i>J. Am. Chem. Soc.</i> <b>2012</b> , <i>134</i> , 3619                                                              |
| [Cd <sub>3</sub> In <sub>17</sub> S <sub>13</sub> Se <sub>18</sub> Cl <sub>4</sub> ] <sup>9-</sup>                                                                 | T4                               | Twisted Cubic <i>Dia</i>                                | 63.5                                           | DMSO                                                        | <i>Inorg. Chem.</i> <b>2019</b> , <i>58</i> , 5126                                                                    |
| [Cd <sub>3</sub> In <sub>17</sub> Se <sub>31</sub> Cl <sub>4</sub> ] <sup>9-</sup>                                                                                 | T4                               | Twisted Hexagonal <i>Dia</i>                            | 67.1                                           | DMSO                                                        | <i>Inorg. Chem.</i> <b>2020</b> , DOI:10.1021/acs.inorgchem.0c00621                                                   |
| [Zn <sub>4</sub> In <sub>16</sub> S <sub>35</sub> ] <sup>14-</sup><br>(ISC-16-Zn)                                                                                  | T4                               | <i>SOD</i>                                              | 74.4                                           | Water/Acetone/DMF/<br>H <sub>2</sub> O/EtOH(1:1)/Piperidine | <i>J. Am. Chem. Soc.</i> <b>2012</b> , <i>134</i> , 3619                                                              |
| [Cd <sub>13</sub> In <sub>22</sub> S <sub>52</sub> (1-MIM) <sub>4</sub> ] <sup>12-</sup><br>(ISC-9)                                                                | T5                               | Cubic <i>Dia</i>                                        | 60.2                                           | DMSO                                                        | <i>J. Mater. Chem. A</i> , <b>2017</b> , <i>5</i> , 8519                                                              |
| [Cu <sub>3</sub> In <sub>30</sub> S <sub>56</sub> H <sub>4</sub> ] <sup>13-</sup>                                                                                  | T5                               | Cubic <i>Dia</i>                                        | 56.9                                           | DMF/DMSO/CH <sub>3</sub> CN<br>+LiBr (0.2 M)                | <i>Angew. Chem. Int. Ed.</i> <b>2018</b> , <i>57</i> , 5374<br><i>Dalton Trans.</i> , <b>2018</b> , <i>47</i> , 6177. |
| [Cd <sub>6</sub> In <sub>28</sub> S <sub>56</sub> H <sub>4</sub> ] <sup>13-</sup><br>(ISC-10-CdInS)                                                                | T5                               | Cubic <i>Dia</i>                                        | 56.9                                           | DMF +LiBr (0.1 M)<br>0.1 M Na <sub>2</sub> S                | <i>Adv. Mater. Interfaces</i> <b>2020</b> , <i>7</i> , 2000016                                                        |
| [Cu <sub>8</sub> Ga <sub>17.5</sub> Sn <sub>9.5</sub> S <sub>56</sub> ] <sup>13.5-</sup><br>(ISC-21)                                                               | T5                               | <i>BCU</i>                                              | 64.0                                           | DMSO                                                        | <i>ACS Appl. Mater. Interfaces</i> <b>2018</b> , <i>10</i> , 13413                                                    |
| [Zn <sub>4</sub> Ge <sub>4</sub> S <sub>13</sub> O <sub>4</sub> H <sub>4</sub> ] <sup>6-</sup>                                                                     | P1                               | <i>PCU</i>                                              | 33.3                                           | H <sub>2</sub> O/EtOH (4:1)                                 | <i>Nano Res.</i> <b>2020</b> , DOI:10.1007/s12274-020-2936-0.                                                         |
| [Cu <sub>5.88</sub> In <sub>11.9</sub> Sn <sub>8.22</sub> S <sub>44</sub> ] <sup>13.54-</sup>                                                                      | P2                               | Twisted <i>PCU</i>                                      | 60.7                                           | H <sub>2</sub> O/Acetone (1:1)                              |                                                                                                                       |
| [Cu <sub>6.09</sub> Ga <sub>9.4</sub> Sn <sub>10.51</sub> S <sub>44</sub> ] <sup>11.67-</sup>                                                                      | P2                               | Twisted <i>PCU</i>                                      | 60.3                                           | H <sub>2</sub> O/Acetone (1:1)                              |                                                                                                                       |

<sup>a</sup> The formula of cations and solvent molecules are omitted for simplicity. The abbreviations of organic molecules including the formulas are listed as follows: CPA—Cyclopentylamine; dach—1,2-diaminocyclohexane; DBN—1,5-diazabicyclo [4.3.0] non-5-ene; 1-MIM—1-methylimidazole.

<sup>b</sup>  $T_n$  ( $n=2, 3, 4, 5$ ) and  $P_n$  ( $n=1, 2$ ) clusters referred to supertetrahedral clusters according to literatures.

<sup>c</sup> The intercluster packing pattern is obtained by treating each barycenter of the discrete cluster in compounds as a pseudo atom (X) and then connecting nearest adjacent X atom (at least four nearest adjacent X atoms are connected) to figure out the topological type of the arrangement mode. The abbreviations of topological symbols are described as follows: *BCU*—body centered cubic; *PCU*—primitive cubic; *Dia*—diamond; *MTN*—one zeolite framework type; *SOD*—sodalite-net.

<sup>d</sup> The solvent-accessible void space is calculated by the *PLANTON* program without taking all inorganic and/or organic cations and solvent molecules into account.

<sup>e</sup> NA means not mentioned in the article.

<sup>f</sup> As the compound is comprised of triangular ring-shaped  $[\text{Mn}_9\text{In}_{33}\text{Se}_{60}(\text{dach})_{24}]^{3-}$  anions and wheel-shaped  $[\text{In}_{18}\text{Se}_{30}(\text{dach})_6]^{6-}$  anions in a 2:1 ratio, the three discrete clusters are regarded as three different pseudo atoms and each pseudo atom connected only with the same type.

**Table S6.** Comparison of selected recent reported cluster-based crystalline metal chalcogenides for photocatalytic dye degradation.

| Formula of metal chalcogenide anion <sup>a</sup>                                                           | Light source                      | Dye <sup>b</sup> ( $\times 10^{-5}$ M) | Catalyst (mg/mL) | Completion time (min) | Ratio (%) | K <sub>a</sub> (min <sup>-1</sup> ) | Ref.                                                                |
|------------------------------------------------------------------------------------------------------------|-----------------------------------|----------------------------------------|------------------|-----------------------|-----------|-------------------------------------|---------------------------------------------------------------------|
| [Ga <sub>16.1</sub> In <sub>7.9</sub> S <sub>40</sub> (CPA) <sub>8</sub> ] <sup>8-</sup>                   | 350 W Xe lamp                     | MB, 3.5                                | 0.25             | 5                     | 98.1      | 0.8144                              | This work                                                           |
| [Ga <sub>24</sub> S <sub>40</sub> (CPA) <sub>8</sub> ] <sup>8-</sup>                                       |                                   |                                        |                  | 13                    | 92.8      | 0.2000                              |                                                                     |
| [Zn <sub>4</sub> In <sub>16</sub> S <sub>35</sub> ] <sup>14-</sup>                                         | 350 W Xe lamp                     | RhB, 10                                | 0.5              | 20                    | 90.5      | NA <sup>c</sup>                     | <i>Inorg. Chem.</i> <b>2020</b> , DOI:10.1021/acs.inorgchem.0c00621 |
| [Cu <sub>5</sub> Sn <sub>4</sub> GaSe <sub>14</sub> ] <sup>4-</sup>                                        | 350 W Xe lamp                     | MB, 1.8                                | 0.5              | 40                    | 98        | 0.0917                              | <i>Inorg. Chem.</i> <b>2020</b> , 59, 7919                          |
| [Cu <sub>5</sub> In <sub>30</sub> Se <sub>48.5</sub> S <sub>3.5</sub> Cl <sub>3</sub> (Im)] <sup>12-</sup> | 300 W Xe lamp, Visible light      | CV, 2                                  | 0.67             | 80                    | 99        | NA                                  | <i>Chem. Eur. J.</i> <b>2020</b> , 26, 1624                         |
| [Cd <sub>6</sub> Ag <sub>4</sub> (SPh) <sub>16</sub> (DMF)(H <sub>2</sub> O)(bpe)] <sub>n</sub>            | 300 W Xe lamp, $\lambda > 420$ nm | RhB, 4.18                              | 1.25             | 20                    | 98        | NA                                  | <i>Inorg. Chem.</i> <b>2020</b> , 59, 2121.                         |
| [Sn <sub>20</sub> O <sub>10</sub> S <sub>32</sub> ] <sup>4-</sup>                                          | 300 W Xe lamp, Visible light      | RhB, 20.2, pH=1                        | 0.6              | 270                   | >98       | NA                                  | <i>Chem. Commun.</i> , <b>2019</b> , 55, 11083                      |
| Cd <sub>6</sub> Ag <sub>4</sub> (SPh) <sub>16</sub> (tmdp) <sub>2</sub>                                    | 50 W Xe lamp, $\lambda > 380$ nm  | RhB, 4.18                              | 2                | 30                    | 98        | NA                                  | <i>Dalton Trans.</i> , <b>2019</b> , 48, 5505                       |
| [Zn <sub>4</sub> In <sub>14</sub> Sn <sub>2</sub> Se <sub>35</sub> ] <sup>12-</sup>                        | 300 W Xe lamp, visible light      | RhB, 1                                 | 0.5              | 360                   | 98.3      | 0.01                                | <i>Inorg. Chem.</i> <b>2019</b> , 58, 12011                         |
|                                                                                                            |                                   | MB, 1                                  |                  | 10                    | 99.9      | 0.66                                |                                                                     |
| [In <sub>10</sub> S <sub>12</sub> Se <sub>8</sub> ] <sup>10-</sup>                                         | 300 W Xe lamp, visible light      | RhB, 1                                 | 0.5              | 840                   | 98.1      | 0.005                               | <i>Cryst. Growth Des.</i> <b>2019</b> , 19, 5716                    |
|                                                                                                            |                                   | MB, 1                                  |                  | 16                    | 99.9      | 0.309                               |                                                                     |
| [In <sub>8.75</sub> Sn <sub>1.25</sub> S <sub>18.5</sub> ] <sup>5.75-</sup>                                | 300 W Xe lamp                     | MB, 12.5                               | 0.1              | 80                    | 90        | NA                                  | <i>Cryst. Growth Des.</i> <b>2019</b> , 19, 4151                    |
| [In <sub>10</sub> S <sub>4</sub> Se <sub>14</sub> ] <sup>6-</sup>                                          | 300 W Xe lamp, $\lambda > 400$ nm | MB, 1                                  | 0.2              | 20                    | 98.6      | 0.197                               | <i>Inorg. Chem. Commun.</i> <b>2019</b> , 102, 251                  |
|                                                                                                            |                                   | Acidic MO, 1, pH=2                     |                  | 25                    | 98.2      | 0.169                               |                                                                     |
| [In <sub>10</sub> S <sub>16</sub> Cl <sub>3</sub> (Bim)] <sup>5-</sup>                                     | 300 W Xe lamp, UV light           | MO, 1                                  | 0.3              | 80                    | 95.4      | NA                                  | <i>Cryst. Growth Des.</i> <b>2018</b> , 18, 962                     |
| [In <sub>10</sub> Se <sub>13.8</sub> Te <sub>2.2</sub> Cl <sub>3</sub> (Bim)] <sup>5-</sup>                | 300 W Xe lamp, Visible light      |                                        |                  | 200                   | ~ 97      |                                     |                                                                     |
| [Mn <sub>4</sub> Sn <sub>6</sub> S <sub>20</sub> ] <sup>8-</sup>                                           | 275 W Hg lamp                     | CV, 1                                  | 0.75             | 150                   | 91.7      | NA                                  | <i>Inorg. Chem. Commun.</i> <b>2018</b> , 93, 73                    |
| [Zn <sub>0.76</sub> Ga <sub>0.70</sub> Ge <sub>2.54</sub> S <sub>8</sub> ] <sup>2.22-</sup>                | 300 W Xe lamp, visible light      | RhB, 2.09                              | 0.5              | 90                    | >98       | 0.03983                             | <i>Chem. Eur. J.</i> <b>2017</b> , 23, 11913.                       |
| [In <sub>36</sub> Se <sub>69</sub> ] <sup>30-</sup>                                                        | 300 W Xe lamp                     | RhB, 8                                 | 0.5              | 240                   | >93       | NA                                  | <i>Inorg. Chem.</i> <b>2017</b> , 56, 14763.                        |
| [In <sub>42.6</sub> Sn <sub>7.4</sub> S <sub>90</sub> ] <sup>22.6-</sup>                                   | 300 W Hg lamp, visible light      | MB, 10                                 | 0.5              | 60                    | 95        | 0.05                                | <i>Cryst. Growth Des.</i> <b>2017</b> , 17, 2936                    |
| [Ag <sub>5</sub> Sn <sub>4</sub> Se <sub>12</sub> ] <sup>3-</sup>                                          | 300 W Xe lamp, $\lambda > 420$ nm | CV, 1                                  | 0.6              | 10                    | 96        | NA                                  | <i>Cryst. Growth Des.</i> <b>2017</b> , 17, 1235                    |
| [AgSb <sub>4</sub> S <sub>7</sub> ]                                                                        | 300 W Xe lamp $\lambda > 420$ nm  | RhB, 2.09                              | 1.25             | 600                   | 91        | NA                                  | <i>Inorg. Chem. Front.</i> , <b>2017</b> , 4, 954                   |
| [AgSb <sub>2</sub> S <sub>4</sub> ]                                                                        |                                   | CV, 2.45                               |                  | 5                     | 94        |                                     |                                                                     |

|                                                                                  |                                        |                       |      |     |       |    |                                                          |
|----------------------------------------------------------------------------------|----------------------------------------|-----------------------|------|-----|-------|----|----------------------------------------------------------|
| $[\text{Ag}_4\text{Sn}_3\text{S}_8]^{2-}$                                        | 300 W Xe lamp<br>$\lambda > 420$ nm    | CV, 1                 | 0.6  | 200 | 92    | NA | <i>Inorg. Chem.</i><br><b>2016</b> , 55, 10855.          |
| $\{[\text{Mn}(2,2\text{-bipy})]_2\text{As}_2\text{S}_8\}^{2-}$                   | 50 W Xe lamp<br>$\lambda > 400$ nm     | CV, 1                 | 1    | 50  | ~100  | NA | <i>J.SolidStateChem.</i><br><b>2016</b> ,135,183.        |
| $[\text{In}_8\text{Sn}_8\text{Se}_{30}(\text{Se}_4)_2]^{2-}$                     | 50 W Xe lamp,<br>Visible light         | MO, 1,<br>pH=3        | 0.25 | 15  | ~ 100 | NA | <i>Inorg. Chem.</i><br><b>2015</b> , 54, 5874.           |
| $[\text{Cu}_{32}\text{Sn}_{12}\text{S}_{48}]^{16-}$                              | visible light                          | MB, 3.13              | 1    | 180 | 100   | NA | <i>Inorg. Chem.</i><br><b>2015</b> , 54, 5301            |
| $[\text{Ge}_{10}\text{Sb}_{28}\text{S}_{72}]^{20-}$                              | 300 W Xe lamp,<br>$\lambda > 420$ nm   | RhB, 1                | 0.56 | 120 | ~94   | NA | <i>Inorg. Chem.</i><br><b>2015</b> , 54, 8474.           |
| $\{\text{Mn}_2\text{Ga}_4\text{Sn}_4\text{S}_{20}[\text{Mn}_2(\text{en})_5]_2\}$ | 500 W Xe lamp,<br>Visible light        | CV, 2.45              | 0.5  | 90  | 100   | NA | <i>Dalton Trans.</i><br><b>2015</b> , 44, 2416.          |
| $[\text{Cd}_6\text{S}(\text{SPh})_{14}(\text{DMF})(\text{bpy})]_n$               | 250 W Xe lamp                          | RhB, 4.18<br>MB, 4.18 | 2    | 180 | 95    | NA | <i>Dalton Trans.</i> ,<br><b>2015</b> , 44, 6400         |
| $[\text{Cd}_6\text{Ag}_4(\text{SPh})_{16}](\text{bpe})_2$                        | 500 W Xe lamp                          | RhB, 4.18             | 2    | 90  | 95    | NA | <i>Chem. Commun.</i> ,<br><b>2014</b> , 50, 3710         |
| 1D and 2D $[\text{HgSb}_2\text{S}_5]^{2-}$                                       | 500 W Xe lamp,<br>$\lambda > 400$ nm   | RhB, 2.09             | 0.3  | 180 | 92    | NA | <i>Cryst. Growth Des.</i> <b>2014</b> ,14,2411           |
| $[\text{GeSb}_2\text{S}_6]^{2-}$                                                 | Xe lamp,<br>$\lambda = 400\sim 780$ nm | RhB, 1                | 0.3  | 480 | 85.1  | NA | <i>CrystEngComm</i> ,<br><b>2013</b> , 15, 5007.         |
| $[\text{In}_3\text{Te}_5(\text{dien})]^-$                                        | UV lamp,<br>$\lambda = 375$ nm         | MO, 1.53              | 0.15 | 420 | ~ 98  | NA | <i>CrystEngComm</i> ,<br><b>2013</b> , 15, 1194.         |
| $[\text{In}_5\text{Te}_9(\text{en})]^{3-}$                                       | UV light                               | MO, 1.53              | 0.15 | 300 | 95.7  | NA | <i>Inorg.Chem,Com</i><br><i>mum.</i> <b>2013</b> ,28,55. |
| $[\text{In}_2\text{Sb}_2\text{Se}_7]^{2-}$                                       | 4 W UV lamps,<br>$\lambda = 254$ nm    | MO, 3.06              | 0.6  | 200 | ~ 100 | NA | <i>CrystEngComm</i> ,<br><b>2012</b> , 14, 90            |
| $[\text{Mn}(\text{tren})]\text{HgSb}_2\text{Se}_5$                               | 300 W Xe lamp,<br>$\lambda > 400$ nm   | RhB, 1                | 0.3  | 240 | 97    | NA | <i>Dalton Trans.</i> ,<br><b>2012</b> , 41, 6689.        |

<sup>a</sup> The formula of cations and solvent molecules are omitted for simplicity. The abbreviations of organic molecules including the formulas are listed as follows: CPA—Cyclopentylamine; Im—Imidazole; SPh—Thiophenol; DMF—N,N-dimethylformamide; bpe—*trans*-1,2-bis(4-pyridyl)ethylene; tmdp—4,4'-trimethylenedipiperidine; Bim—1-butyl-2-methylimidazole; 2,2-bipy—2,2'-dipyridyl; en—Ethylenediamine; bpy—4,4'-bipyridine; dien—diethylenetriamine; tren—tris(2-aminoethyl)amine.

<sup>b</sup> The abbreviations of dye molecules are listed as follows: MB—Methylene blue; RhB—Rhodamine B; CV—Crystal Violet; MO—Methyl Orange.

<sup>c</sup> NA means not mentioned in the article.

## References

- 1 Y. Wang, Z. Zhu, Z. Sun, Q. Hu, J. Li, J. Jiang and X. Huang, Discrete Supertetrahedral T5 Selenide Clusters and Their Se/S Solid Solutions: Ionic-Liquid-Assisted Precursor Route Syntheses and Photocatalytic Properties, *Chem. -Eur. J.*, 2020, **26**, 1624-1632.
- 2 M. Hao, Q. Hu, Y. Zhang, M. Luo, Y. Wang, B. Hu, J. Li and X. Huang, Soluble Supertetrahedral Chalcogenido T4 Clusters: High Stability and Enhanced Hydrogen Evolution Activities, *Inorg. Chem.*, 2019, **58**, 5126-5133.
- 3 C. Xue, L. Zhang, X. Wang, D. Hu, X.-L. Wang, J. Zhang, R. Zhou, D.-S. Li, H. Su and T. Wu, Enhanced Water Dispersibility of Discrete Chalcogenide Nanoclusters with a Sodalite-Net Loose-Packing Pattern in a Crystal Lattice, *Inorg. Chem.*, 2020, **59**, 15587-15594.
